# Supplementary material
Source: publisher figshare collection journal article supplement (https://acs.figshare.com/ndownloader/files/9171784)
Supplement: Supplementary file 1 [file 9171784]

## Supporting Information

### Bistinospinosides A and B, Dimeric Clerodane Diterpene Glycosides from *Tinospora sagittata*

Wei Li,\* Chao Huang, Qingbo Liu, and Kazuo Koike

Faculty of Pharmaceutical Sciences, Toho University, Miyama 2-2-1, Funabashi, Chiba  
274-8510, Japan

\*Corresponding author. Tel.: +81-47-4721161. Fax: +81-47-4721404.

E-mail address: liwei@phar.toho-u.ac.jp (W. Li)

## List of Contents

| No. | Content                                                                              | Page |
|-----|--------------------------------------------------------------------------------------|------|
| 1   | <b>Figure S1.</b> The $^1\text{H}$ -NMR Spectrum of Compound <b>1</b>                | 1    |
| 2   | <b>Figure S2.</b> The $^{13}\text{C}$ -NMR Spectrum of Compound <b>1</b>             | 2    |
| 3   | <b>Figure S3.</b> The $^1\text{H}$ - $^1\text{H}$ COSY Spectrum of Compound <b>1</b> | 3    |
| 4   | <b>Figure S4.</b> The HMQC Spectrum of Compound <b>1</b>                             | 4    |
| 5   | <b>Figure S5.</b> The HMBC Spectrum of Compound <b>1</b>                             | 5    |
| 6   | <b>Figure S6.</b> The NOESY Spectrum of Compound <b>1</b>                            | 6    |
| 7   | <b>Figure S7.</b> The $^1\text{H}$ -NMR Spectrum of Compound <b>2</b>                | 7    |
| 8   | <b>Figure S8.</b> The $^{13}\text{C}$ -NMR Spectrum of Compound <b>2</b>             | 8    |
| 9   | <b>Figure S9.</b> The $^1\text{H}$ - $^1\text{H}$ COSY Spectrum of Compound <b>2</b> | 9    |
| 10  | <b>Figure S10.</b> The HMQC Spectrum of Compound <b>2</b>                            | 10   |
| 11  | <b>Figure S11.</b> The HMBC Spectrum of Compound <b>2</b>                            | 11   |
| 12  | <b>Figure S12.</b> The NOESY Spectrum of Compound <b>2</b>                           | 12   |
| 13  | Computer Assistant Chemical Structure Calculation                                    | 13   |

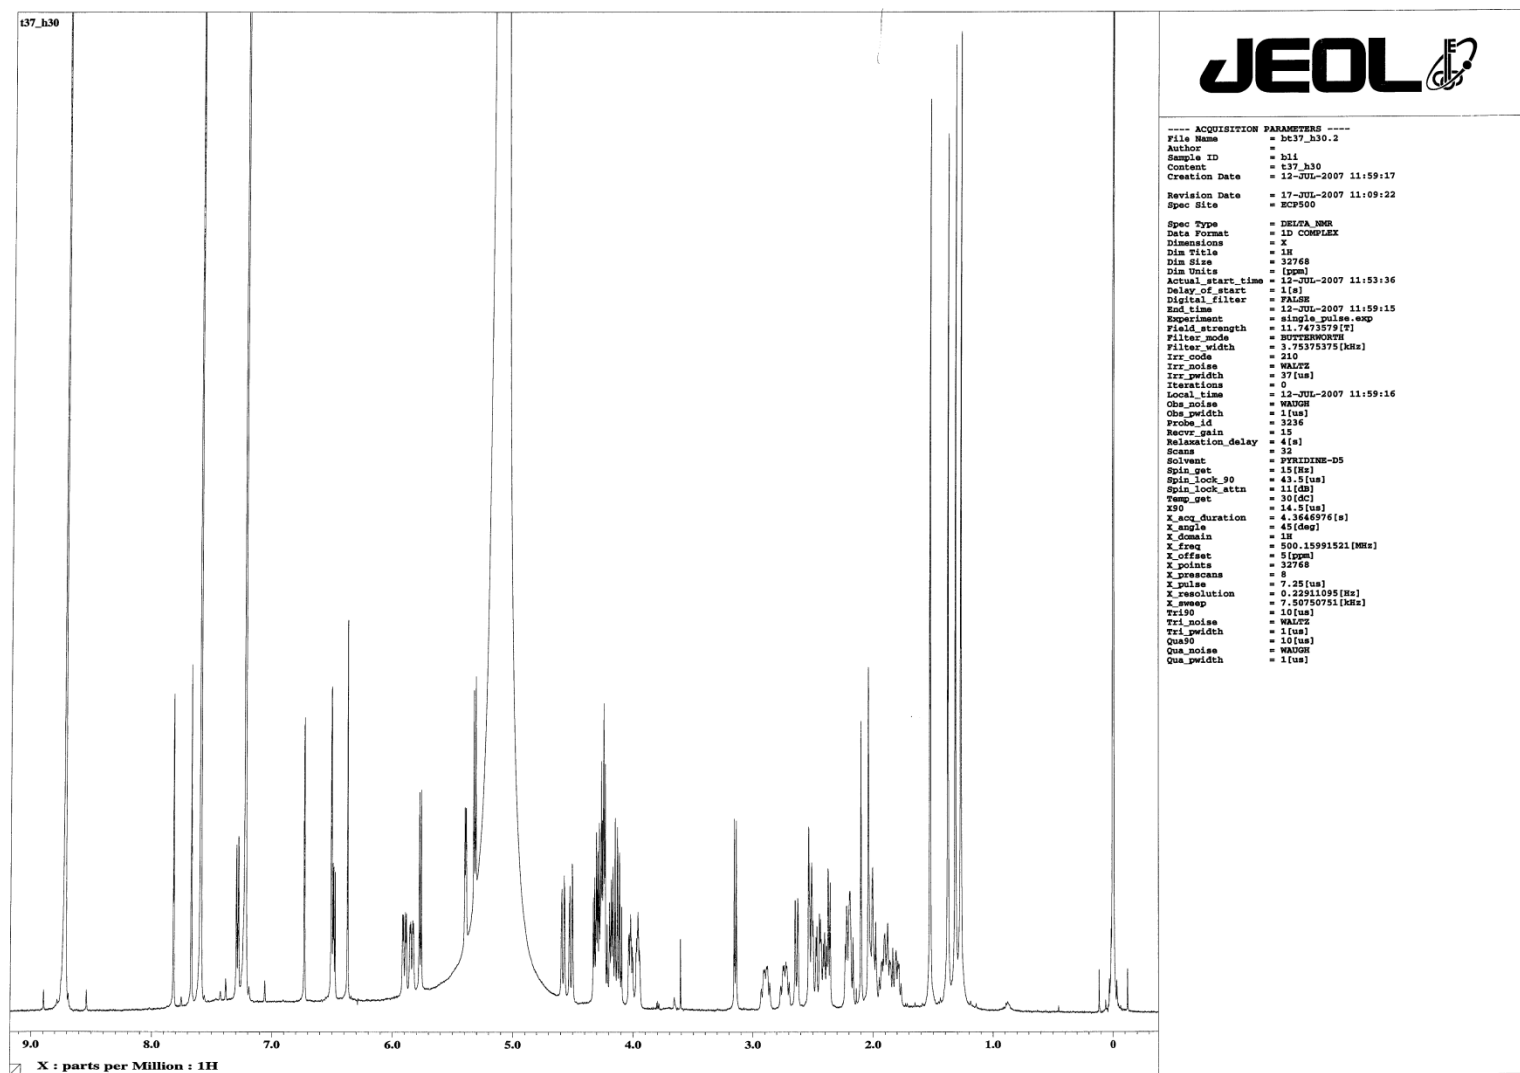

**Figure S1.** The  $^1\text{H}$ -NMR Spectrum of Compound **1**

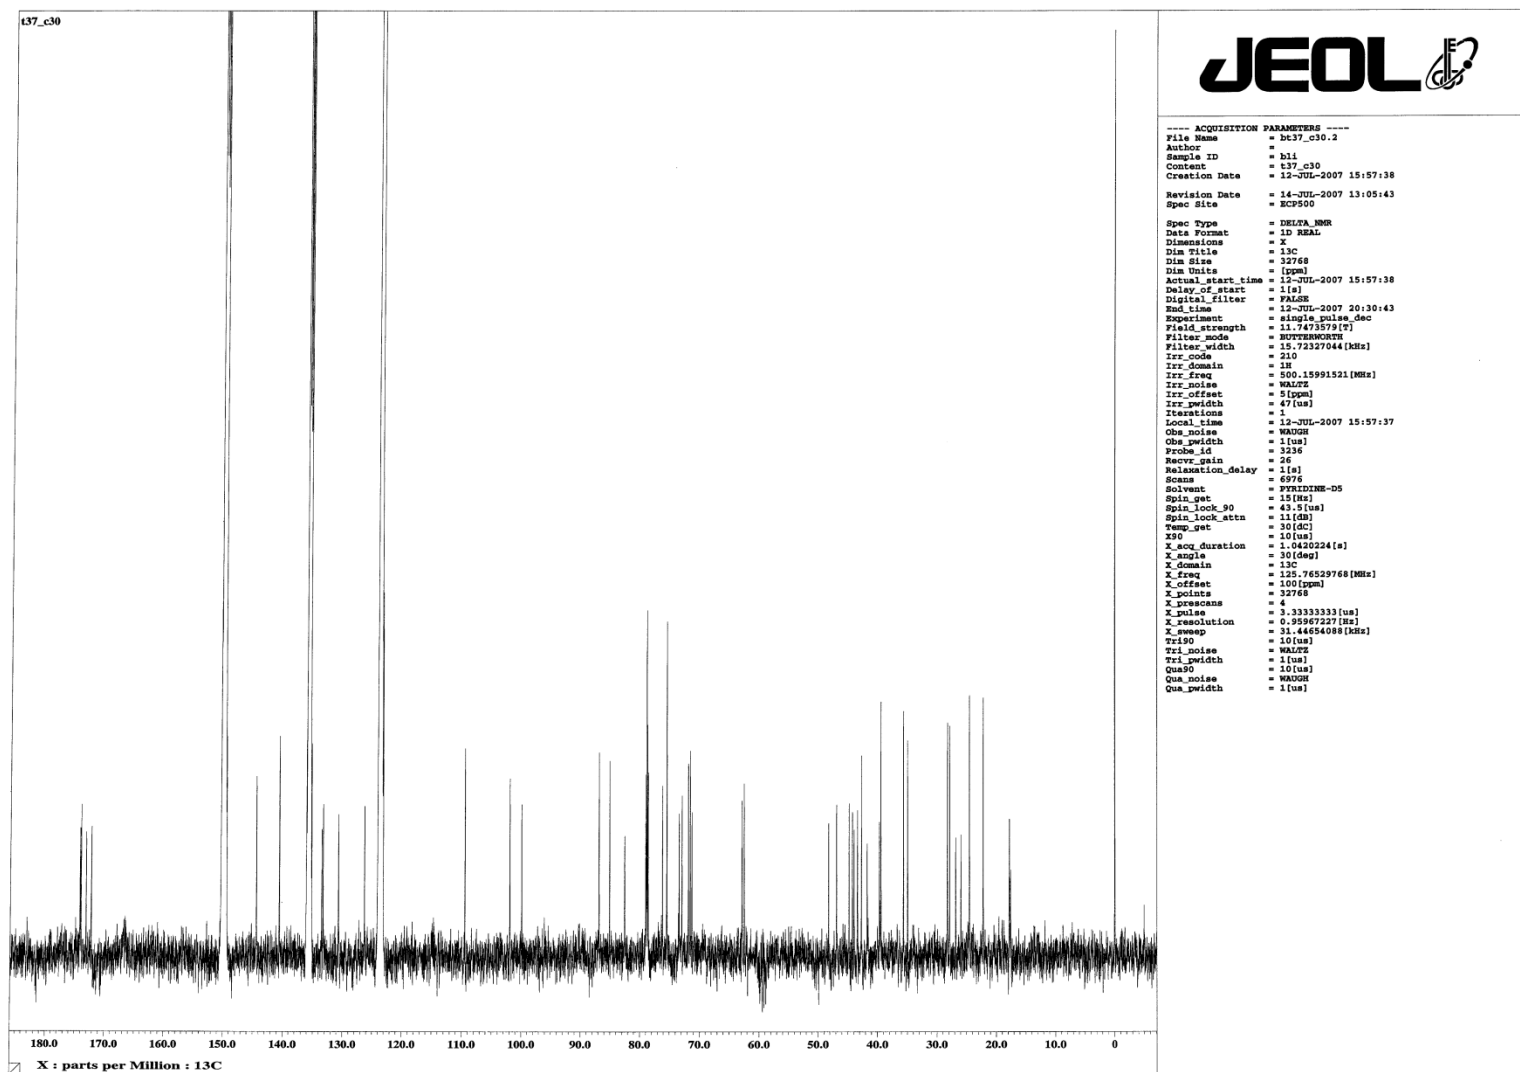

Figure S2. The  $^{13}\text{C}$ -NMR Spectrum of Compound 1

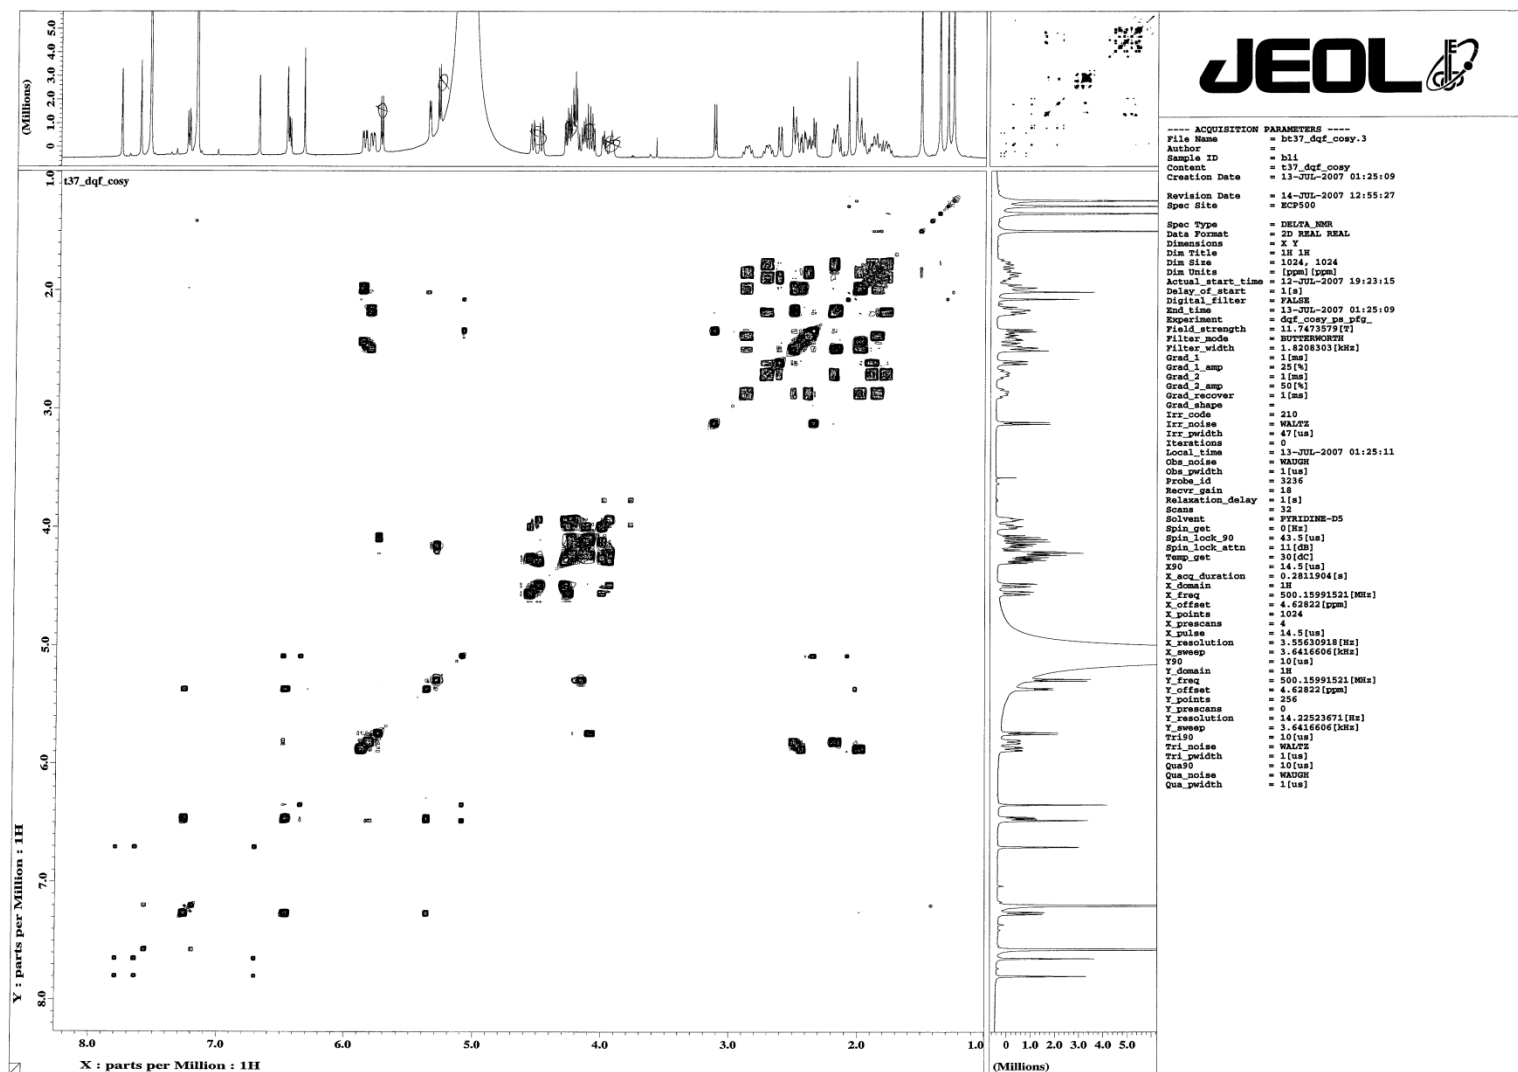

Figure S3. The  $^1\text{H}$ - $^1\text{H}$  COSY Spectrum of Compound **1**

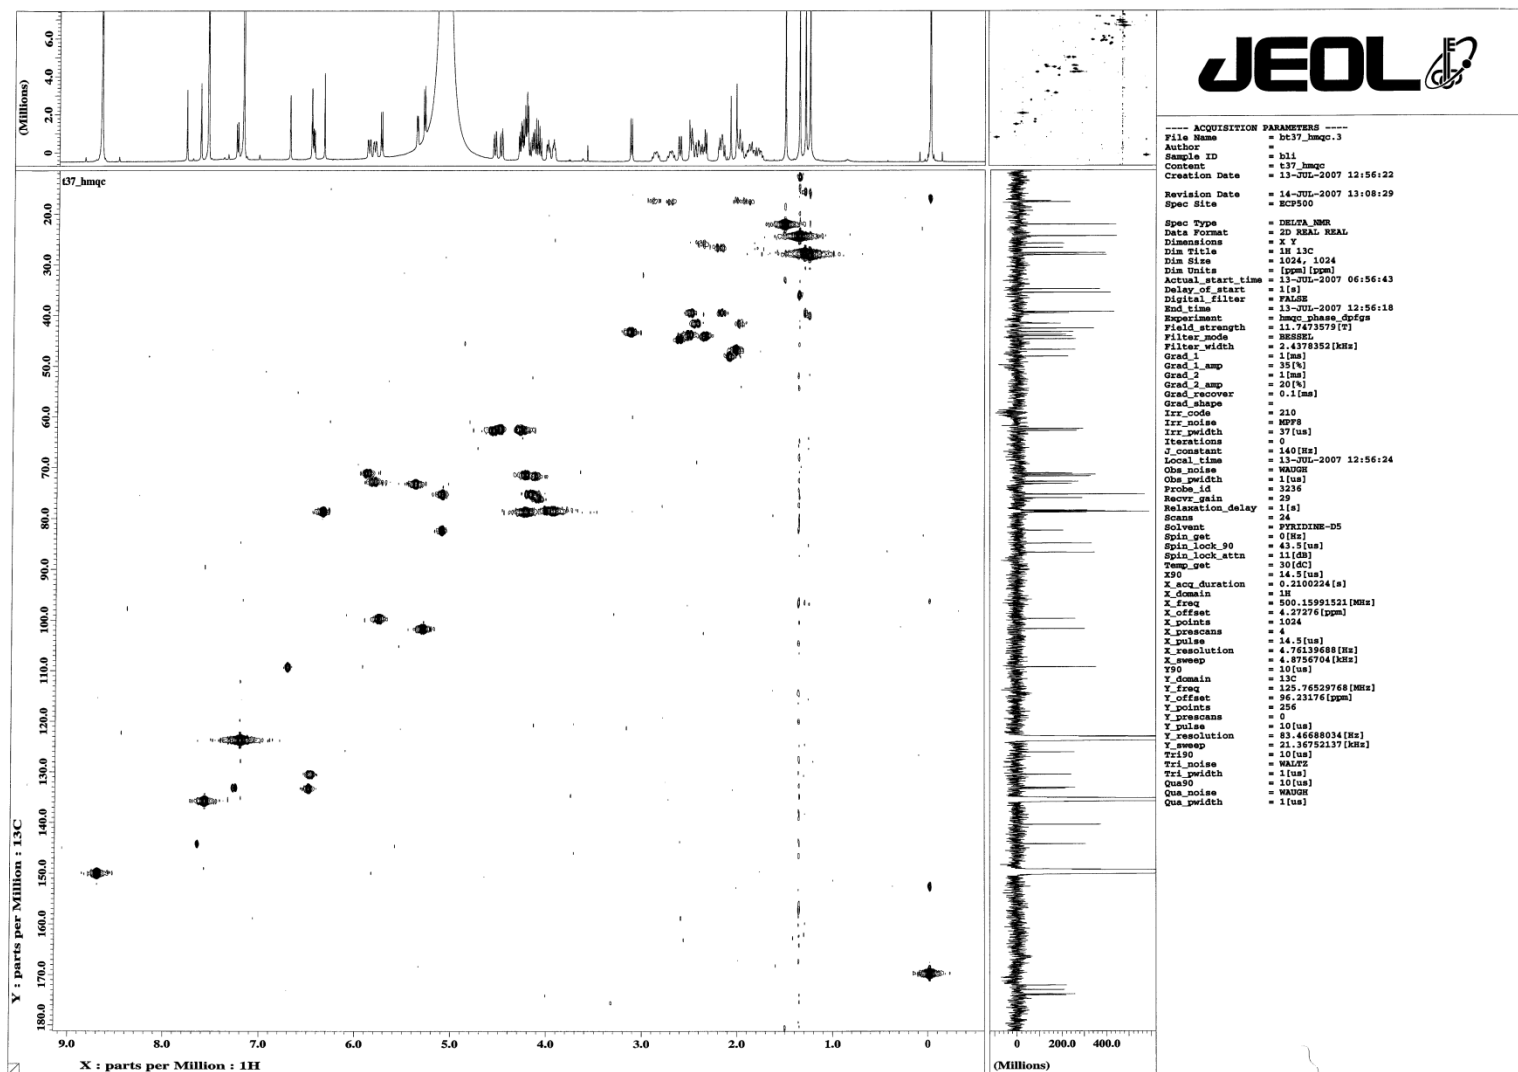

Figure S4. The HMQC Spectrum of Compound 1

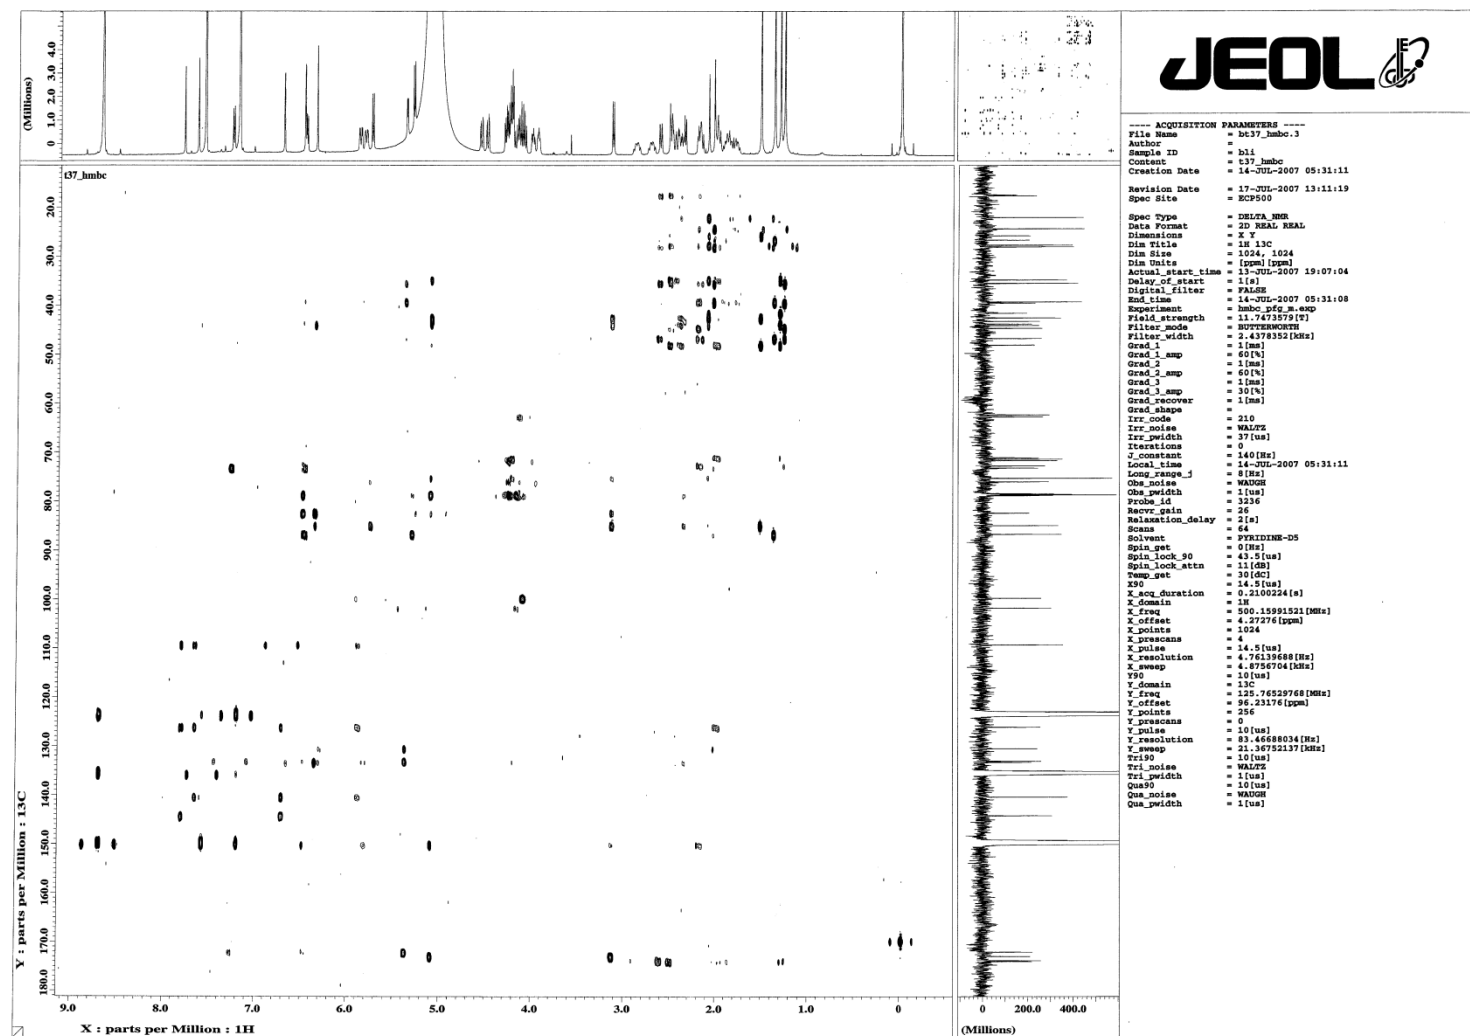

Figure S5. The HMBC Spectrum of Compound 1

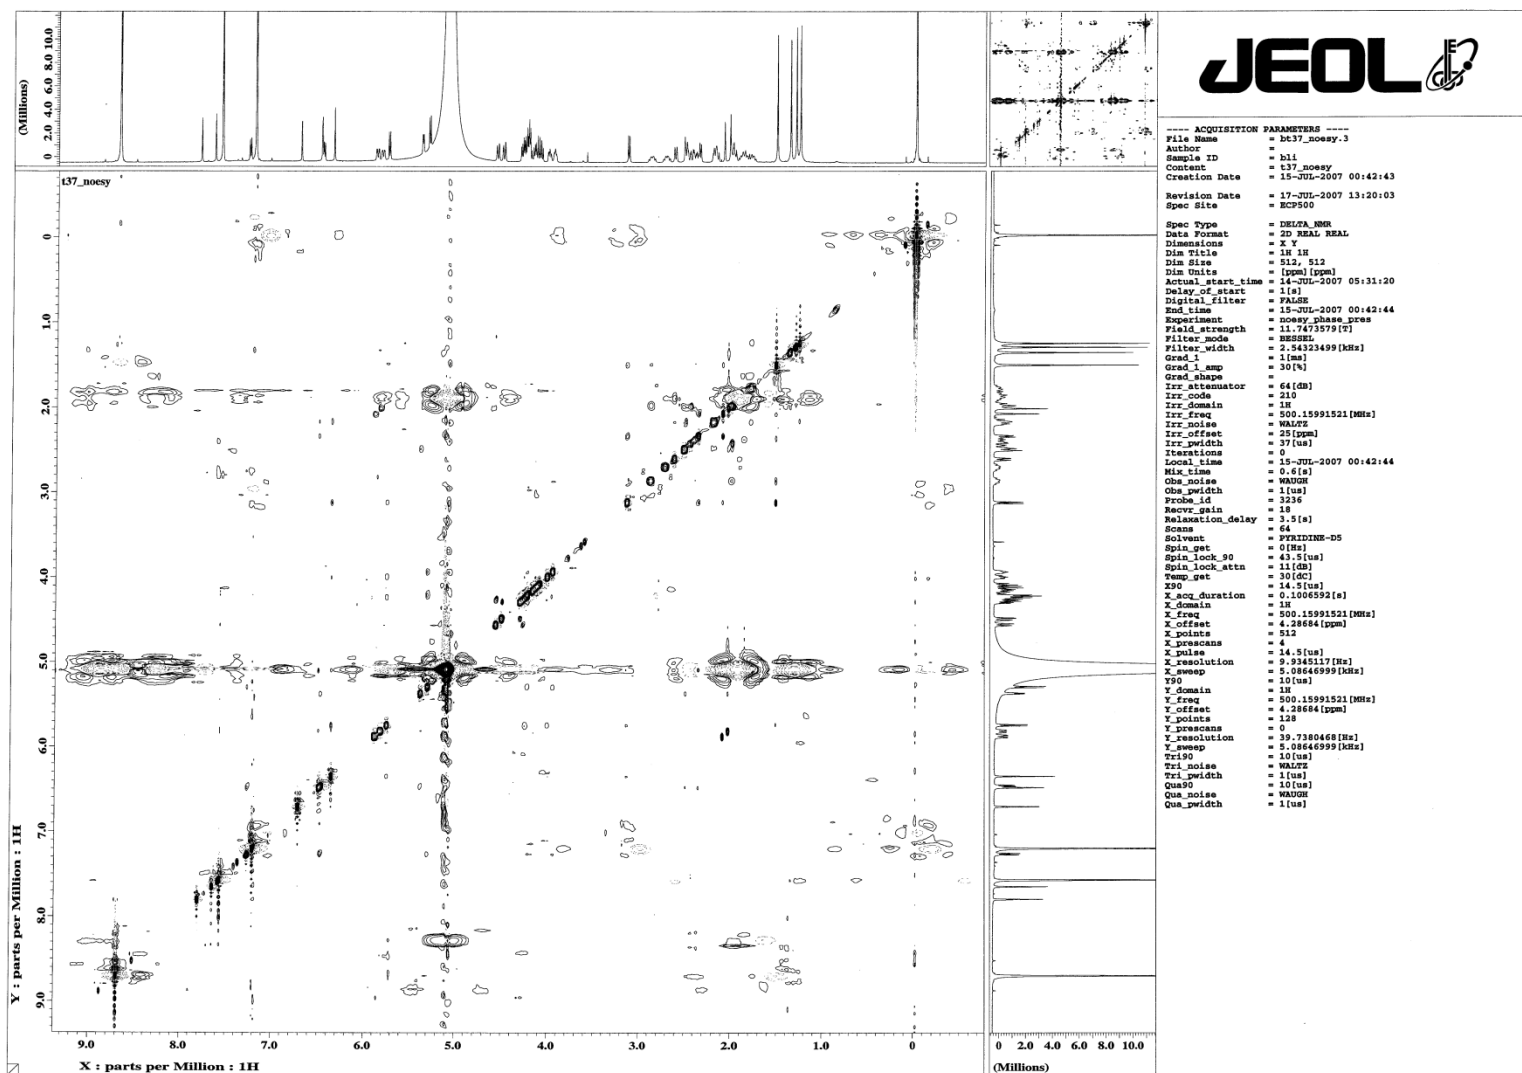

Figure S6. The NOESY Spectrum of Compound 1



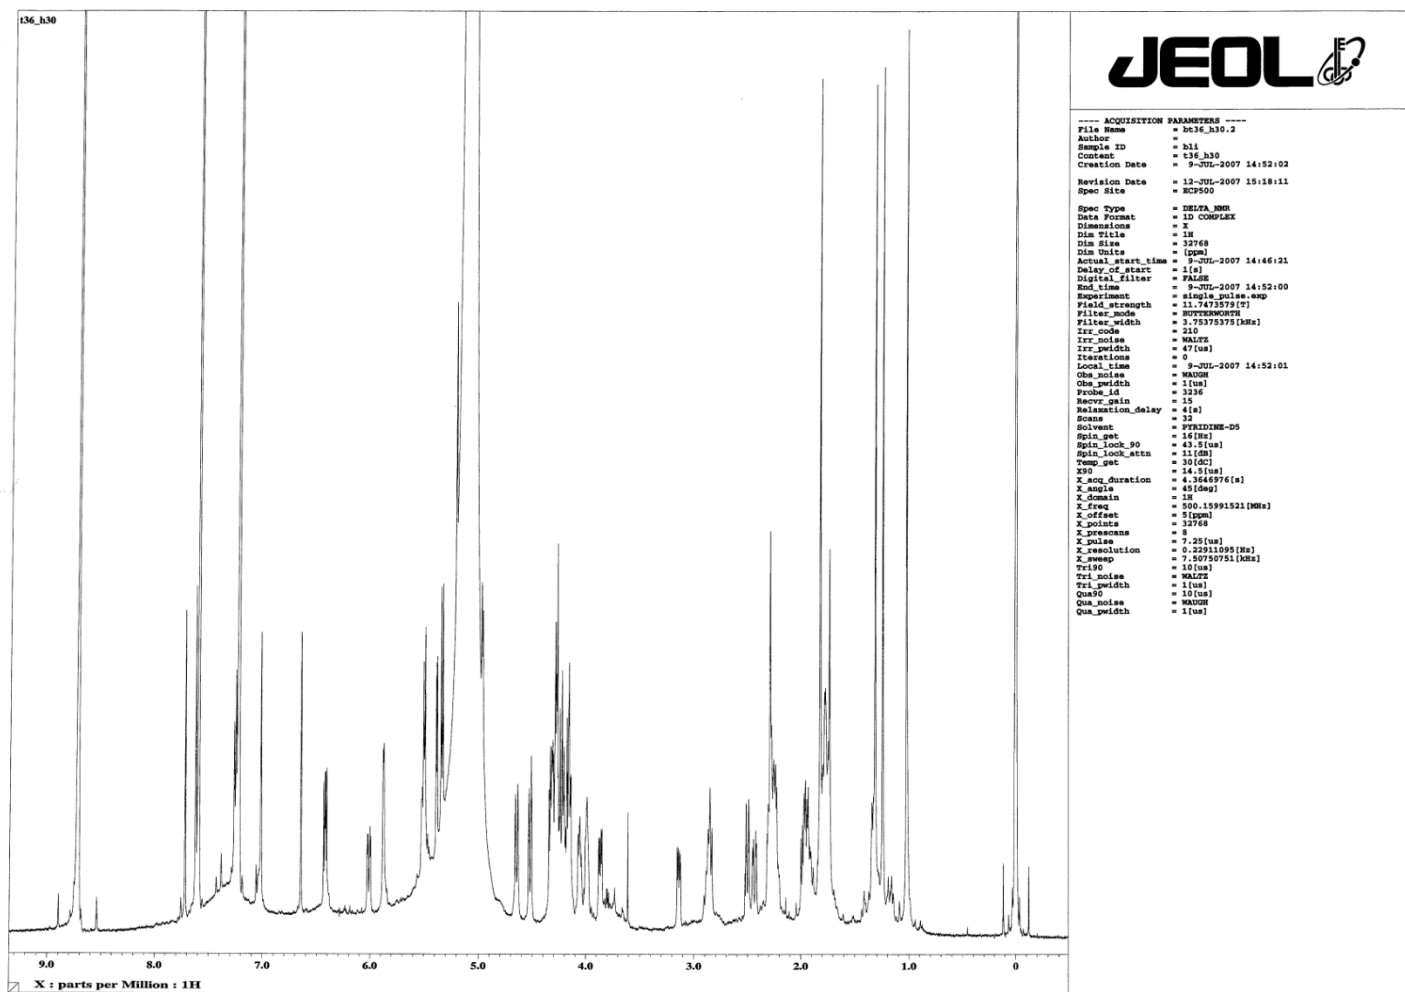

**Figure S7.** The  $^1\text{H}$ -NMR Spectrum of Compound **2**

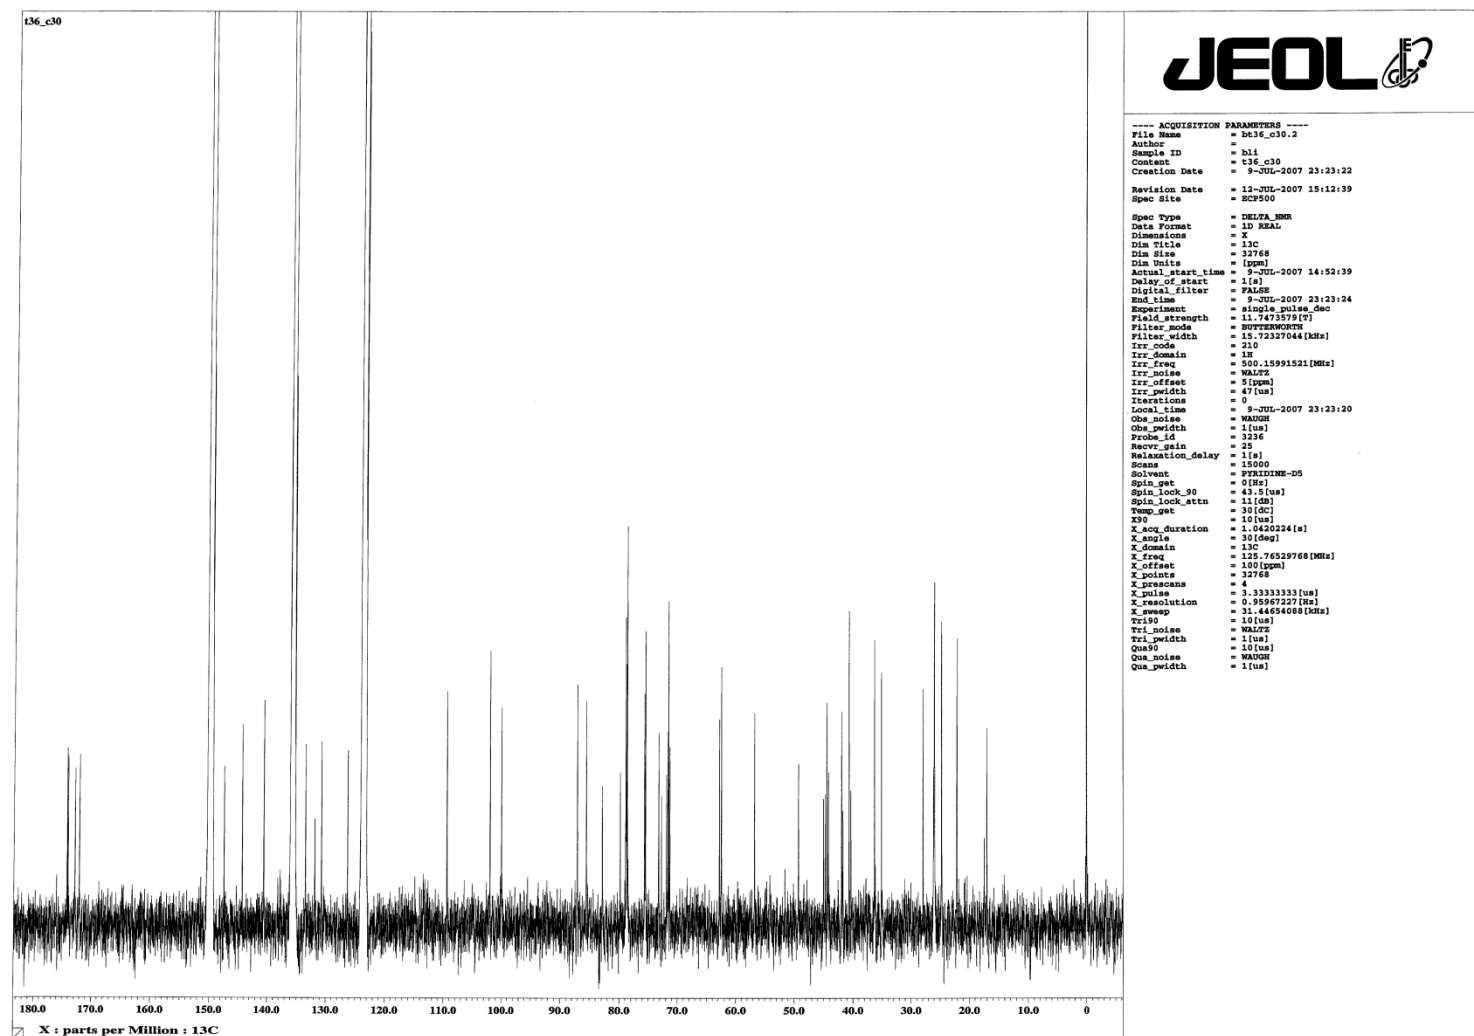

Figure S8. The  $^{13}\text{C}$ -NMR Spectrum of Compound 2

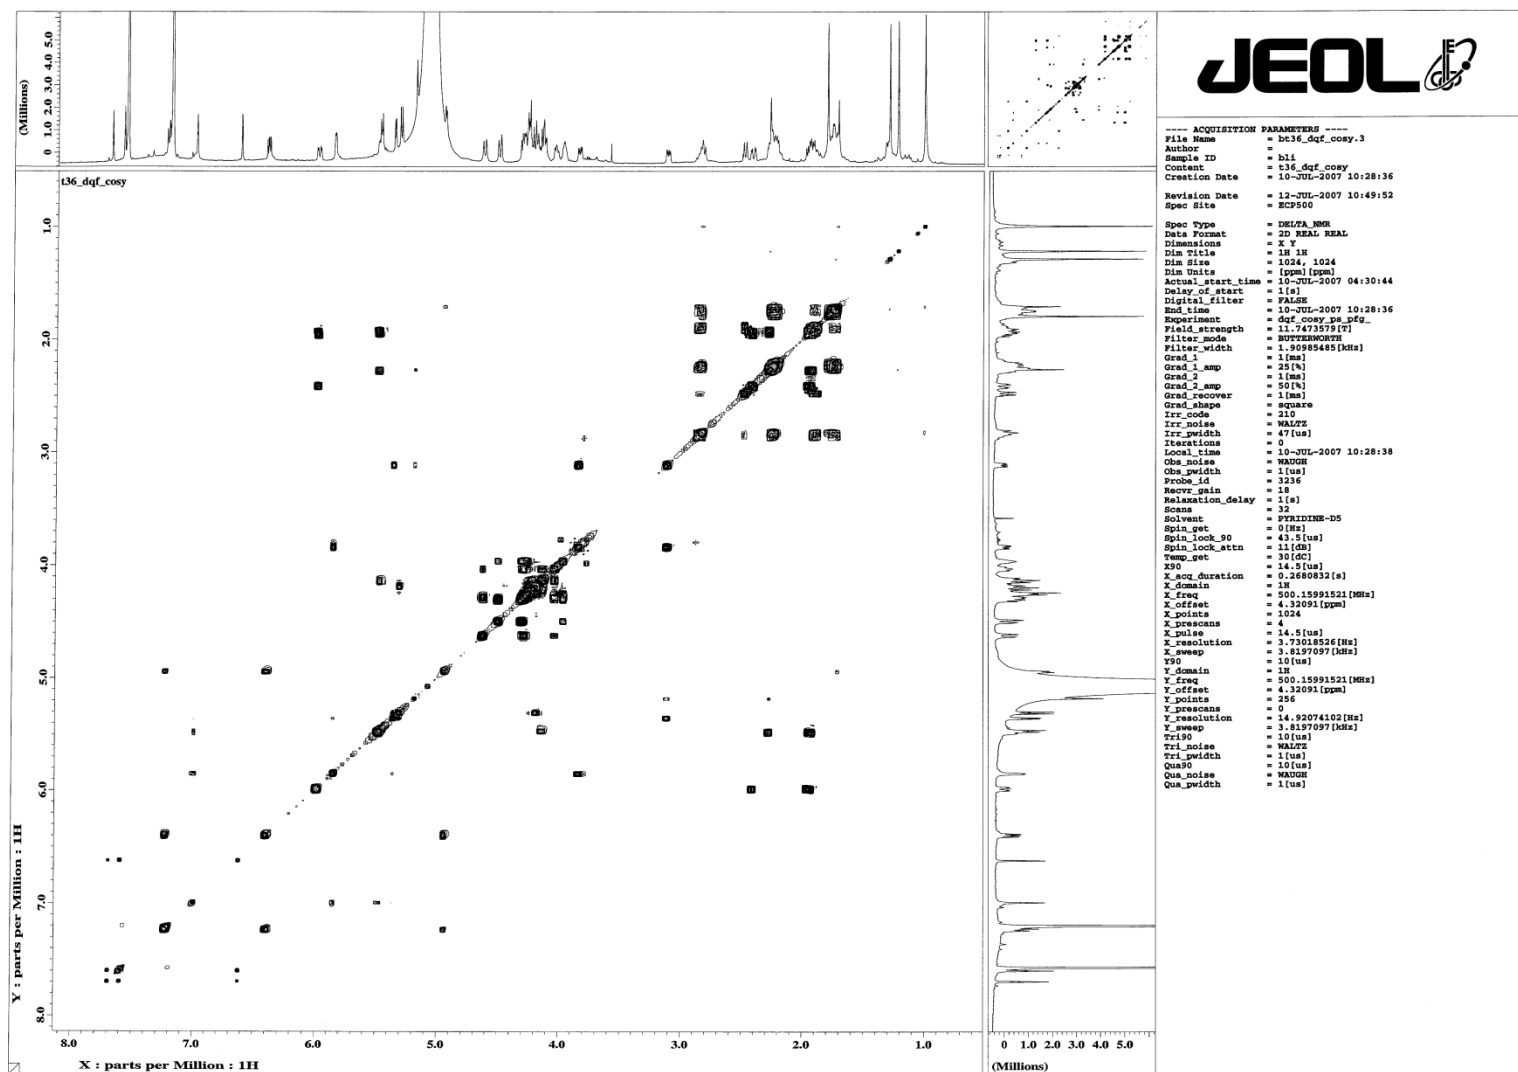

Figure S9. The  $^1\text{H}$ - $^1\text{H}$  COSY Spectrum of Compound 2

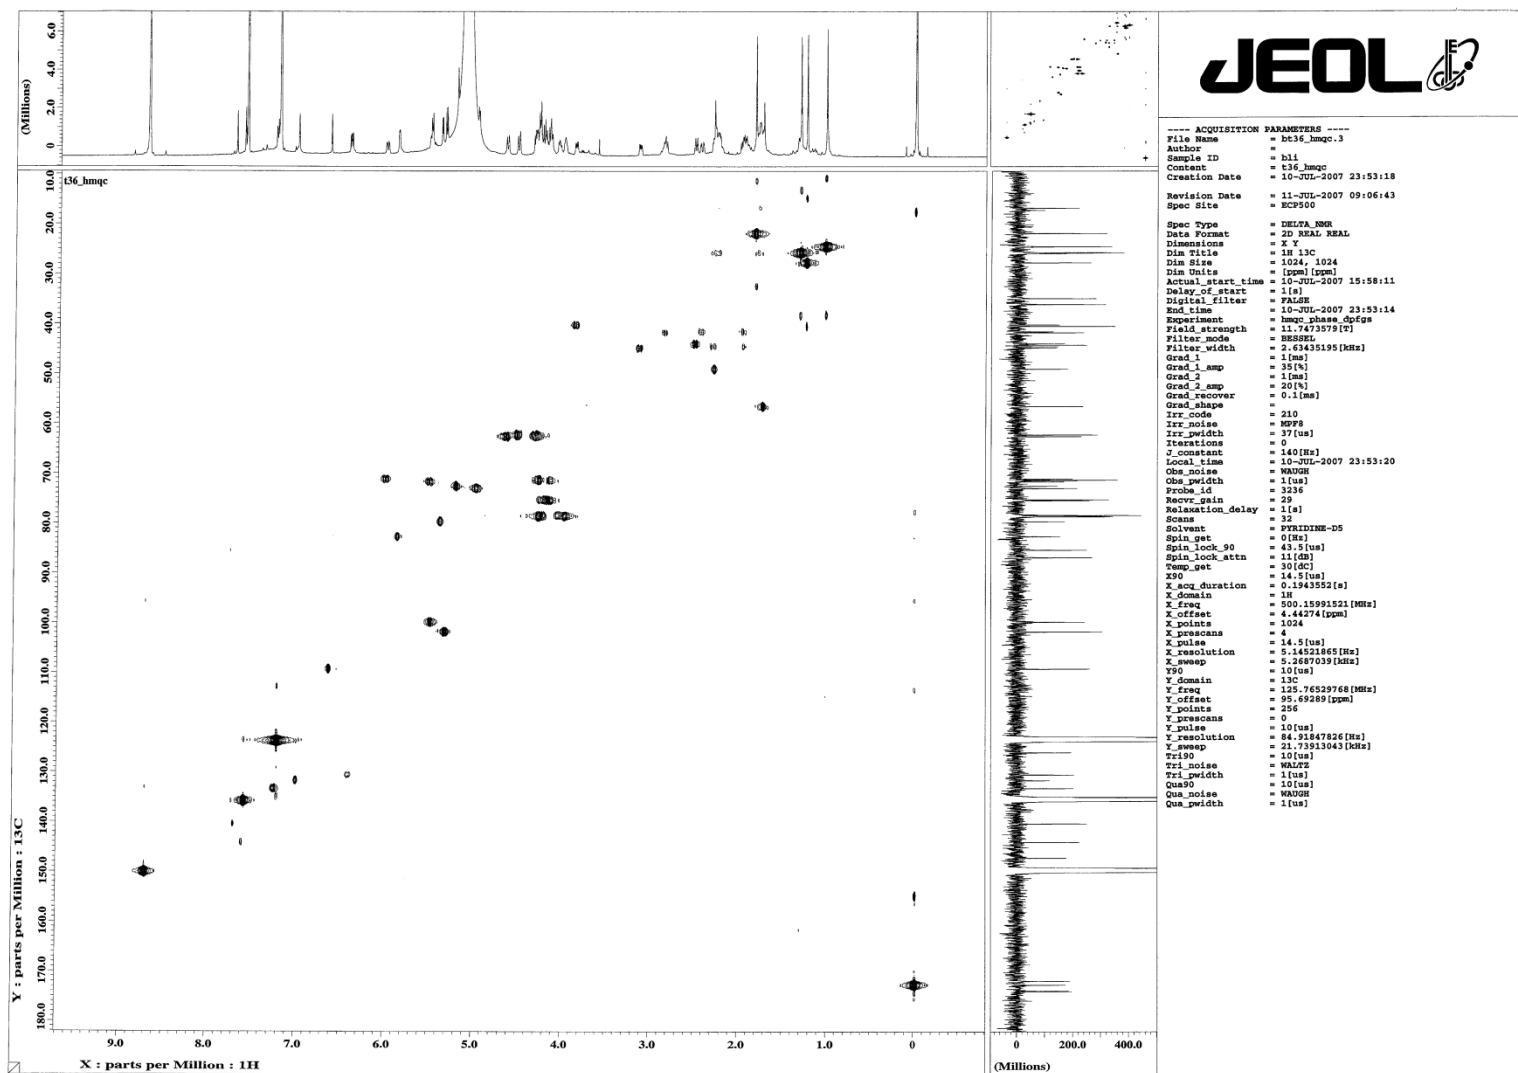

Figure S10. The HMQC Spectrum of Compound 2

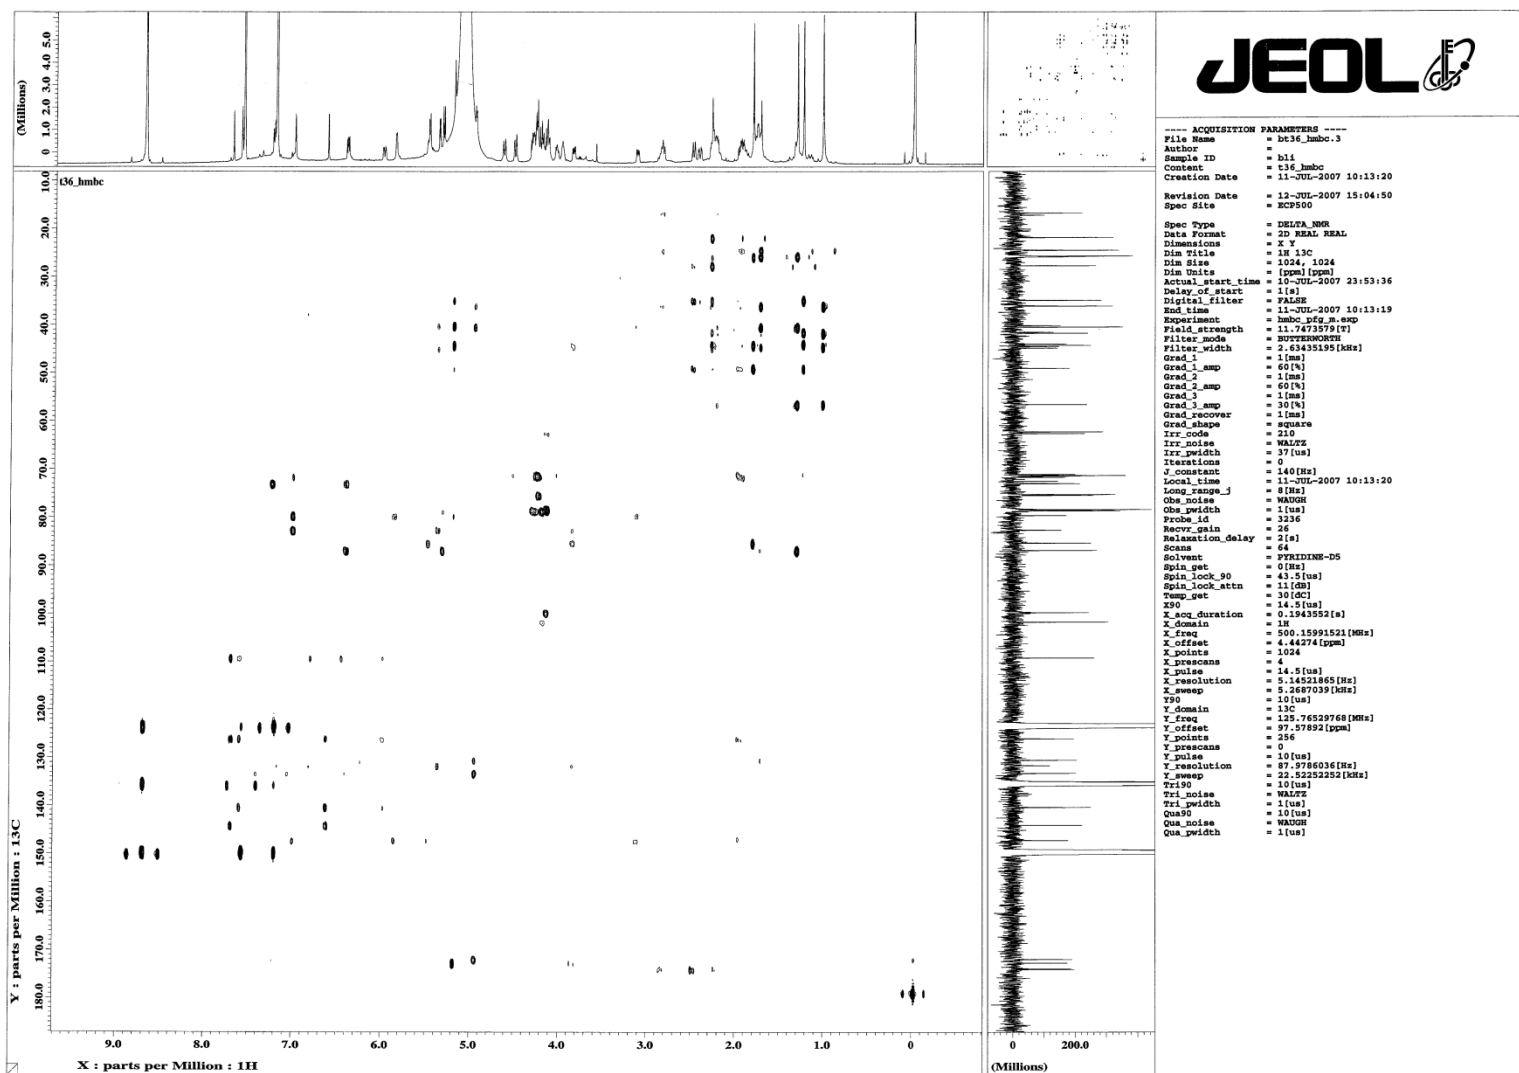

Figure S11. The HMBC Spectrum of Compound 2

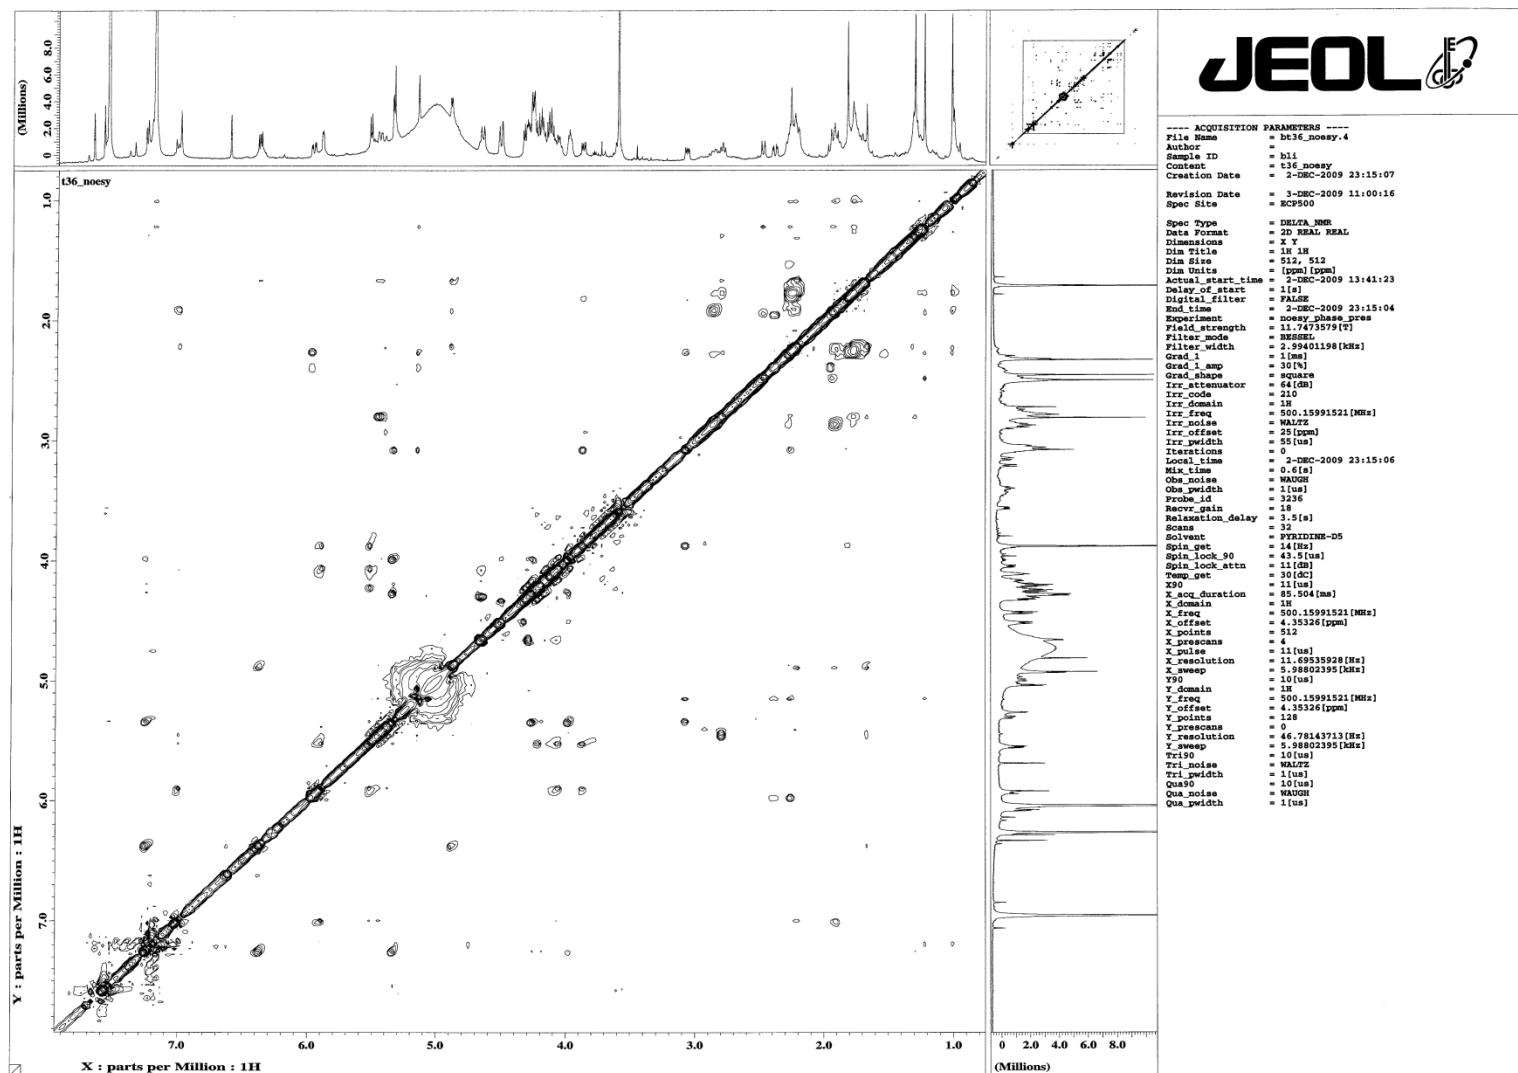

**Figure S12.** The NOESY Spectrum of Compound 2

### **Computer Assistant Chemical Structure Calculation**

For reparation of structures and analysis of dynamics cascade, the planar structure of aforementioned compounds were constructed using Chem Draw ultra 10.0 software [Chemical Structure Drawing Standard; Cambridge Soft Corporation, USA (2005)]. And we employ a standard dynamics cascade protocol for calculating the three-dimensional structures of the aforementioned compounds using Discovery Studio Version 2.1, by five steps: Minimization, Minimization2, Heating, Equilibration and Production. The protocol provides the total energy values to standardize validation of any conformations. The conformation generation algorithms are Windows OS compatible; in the current study three-dimensional conformations were generated on a Intel® Core™ i7-920 processor with 3GB RAM and NVIDIA® Quadro® FX1700 512MB, running Windows XP Pro SP3.
